# Supplementary material for: Association of DNA methylation and genetic variations of the APOE gene with the risk of diabetic dyslipidemia
Source: PubMed Central journal article supplement — Biomed Rep. 2022 May 27;17(1):61. doi: 10.3892/br.2022.1544 (PMC9198989; doi:10.3892/br.2022.1544), 2022-05-27
Supplement: Supplementary_Data.pdf [file Supplementary_Data.pdf]

Table SI. Demographic and biochemical characteristics of study subjects (mean ranks).

| Variable                           | With dyslipidemia | Without dyslipidemia | P-value            |
|------------------------------------|-------------------|----------------------|--------------------|
| Age, years                         | 101.3             | 103.6                | 0.786              |
| Body mass index, kg/m <sup>2</sup> | 137.4             | 71.5                 | 0.000 <sup>a</sup> |
| Systolic blood pressure            | 95.8              | 108.5                | 0.124              |
| DBP                                | 95.7              | 108.5                | 0.121              |
| HbA1C                              | 100.2             | 104.5                | 0.591              |
| FBS                                | 105.6             | 99.8                 | 0.480              |
| TG                                 | 133.9             | 74.6                 | 0.000 <sup>a</sup> |
| TC                                 | 133.8             | 74.6                 | 0.000 <sup>a</sup> |
| HDL-C                              | 76.8              | 125.4                | 0.000 <sup>a</sup> |
| LDL-C                              | 138.2             | 70.8                 | 0.000 <sup>a</sup> |

<sup>a</sup>P<0.0001. Data are presented as the mean rank using a Mann Whitney U test.

Table SII. Clinical and biochemical data for participants who were included in the methylation analysis compared to those who were not included.

| Variable                             | Group A                 |                            |                      | Group B                |                       |                    |
|--------------------------------------|-------------------------|----------------------------|----------------------|------------------------|-----------------------|--------------------|
|                                      | With dyslipidemia, n=61 | Without dyslipidemia, n=58 | P-value              | Total, n=119, included | Total, n=85, excluded | P-value            |
| Age                                  | 62.1(10.1)              | 63.5(10.5)                 | 0.438 <sup>e</sup>   | 62.8(10.3)             | 62.7(10.2)            | 0.953 <sup>e</sup> |
| Sex, female:male                     | 23/38                   | 26/32                      | 0.434 <sup>d</sup>   | 49/70                  | 30/55                 | 0.241 <sup>d</sup> |
| Body mass index, kg/m <sup>2</sup>   | 30.2(3.8)               | 24.8(3.6)                  | 0.000 <sup>b,c</sup> | 27.5(4.5)              | 26.6(4.5)             | 0.134 <sup>e</sup> |
| Systolic blood pressure              | 135.9(19.4)             | 141.6(16.9)                | 0.088 <sup>e</sup>   | 138.9(18.3)            | 135.7(21.7)           | 0.263 <sup>e</sup> |
| Diastolic blood pressure             | 77.5(13.5)              | 81.5(11.3)                 | 0.083 <sup>e</sup>   | 80.1(10.7)             | 78.9(14)              | 0.477 <sup>e</sup> |
| HbA1C                                | 7.9(1.2)                | 8.3(1.7)                   | 0.208 <sup>e</sup>   | 8.1(1.5)               | 8(1.3)                | 0.471 <sup>e</sup> |
| Fasting blood glucose                | 230(102.8)              | 234.5(103.1)               | 0.811 <sup>e</sup>   | 232.4(102.4)           | 236.3(98.6)           | 0.784 <sup>e</sup> |
| Total triglyceride                   | 221.5(104.8)            | 153(61.2)                  | 0.000 <sup>b,c</sup> | 187.9(92.7)            | 212.4(153.8)          | 0.159 <sup>e</sup> |
| Total cholesterol                    | 224.1(71.2)             | 166.7(49.2)                | 0.000 <sup>b,c</sup> | 196.2(67.6)            | 199(93.6)             | 0.801 <sup>e</sup> |
| High density lipoprotein-cholesterol | 39.4(13.7)              | 46.7(14.2)                 | 0.005 <sup>a,c</sup> | 43.3(15)               | 43.1(20.1)            | 0.930 <sup>e</sup> |
| Low density lipoprotein-cholesterol  | 156(52.3)               | 100.5(41.4)                | 0.000 <sup>b,c</sup> | 128.3(55.3)            | 125(61.9)             | 0.685 <sup>e</sup> |

<sup>a</sup>P<0.01, <sup>b</sup>P<0.0001. Data presented as the mean(SD).<sup>c</sup>Unpaired Student's t-test. <sup>d</sup> $\chi^2$ -test.

Table SIII. Distribution of age and sex on BMI and LDL values for participants who included in methylation analysis

| Without dyslipidemia |                        |              | With dyslipidemia |                        |              |
|----------------------|------------------------|--------------|-------------------|------------------------|--------------|
| Variable             | BMI, kg/m <sup>2</sup> | LDL, mg/dl   | Variable          | BMI, kg/m <sup>2</sup> | LDL, mg/dl   |
| Sex (n)              |                        |              | Sex (n)           |                        |              |
| Female (26)          | 24.7 (3.4)             | 91.8 (32.8)  | Female (23)       | 29.9 (3.9)             | 164.1 (56.5) |
| Male (32)            | 24.9 (3.8)             | 107.6 (46.6) | Male (38)         | 30.3 (3.8)             | 151 (49.7)   |
| P-value <sup>a</sup> | 0.823                  | 0.149        | P-value           | 0.71                   | 0.347        |
| Age, years           |                        |              | Age, years        |                        |              |
| ≤50                  | 23.6 (1.9)             | 113.9 (71.6) | ≤50               | 30 (3.5)               | 142.3 (43.8) |
| 51-60                | 25.9 (3.8)             | 108.7 (43.5) | 51-60             | 31.6 (3.6)             | 178.3 (53.1) |
| 61-70                | 25.5 (3.5)             | 102 (35.8)   | 61-70             | 29.7 (2.8)             | 142.7 (53.3) |
| >70                  | 23.2 (3.6)             | 83.3 (22.2)  | >70               | 29.1 (5)               | 155.1 (50.3) |
| P-value <sup>b</sup> | 0.091                  | 0.265        | P-value           | 0.244                  | 0.158        |

Data presented as the mean (SD). <sup>a</sup>Unpaired Student-s t-test. <sup>b</sup>One-way ANOVA. BMI, body mass index; LDL, low density lipoprotein.
